# Supplementary material for: Oil-sealed femtoliter fiber-optic arrays for single molecule analysis
Source: Royal Society of Chemistry journal article supplement (doi:10.1039/c2lc21113k), 2012-01-01
Supplement: c2lc21113k.pdf [file c2lc21113k.pdf]

## Electronic Supplementary Information (ESI)

### Oil-sealed femtoliter fiber-optic arrays for single molecule analysis

5

Huaibin Zhang, Shuai Nie,<sup>‡</sup> Candice M. Etson,<sup>‡</sup> Raymond M. Wang, and David R. Walt\*

Department of Chemistry, Tufts University, 62 Talbot Avenue, Medford, Massachusetts, USA.

10

\*Corresponding author: Fax: 016176273443; Tel: 016176273470; E-mail: [david.walt@tufts.edu](mailto:david.walt@tufts.edu)

<sup>‡</sup> S. Nie and C. M. Etson contributed equally to this work.

#### Content:

15

- Fig. S1: Fluorescence micrograph showing on-chip sealing with mineral oil
- Fig. S2: Histograms of observed velocities of  $\beta$ -gal enzymes sealed with mineral oil and fluorinated oil

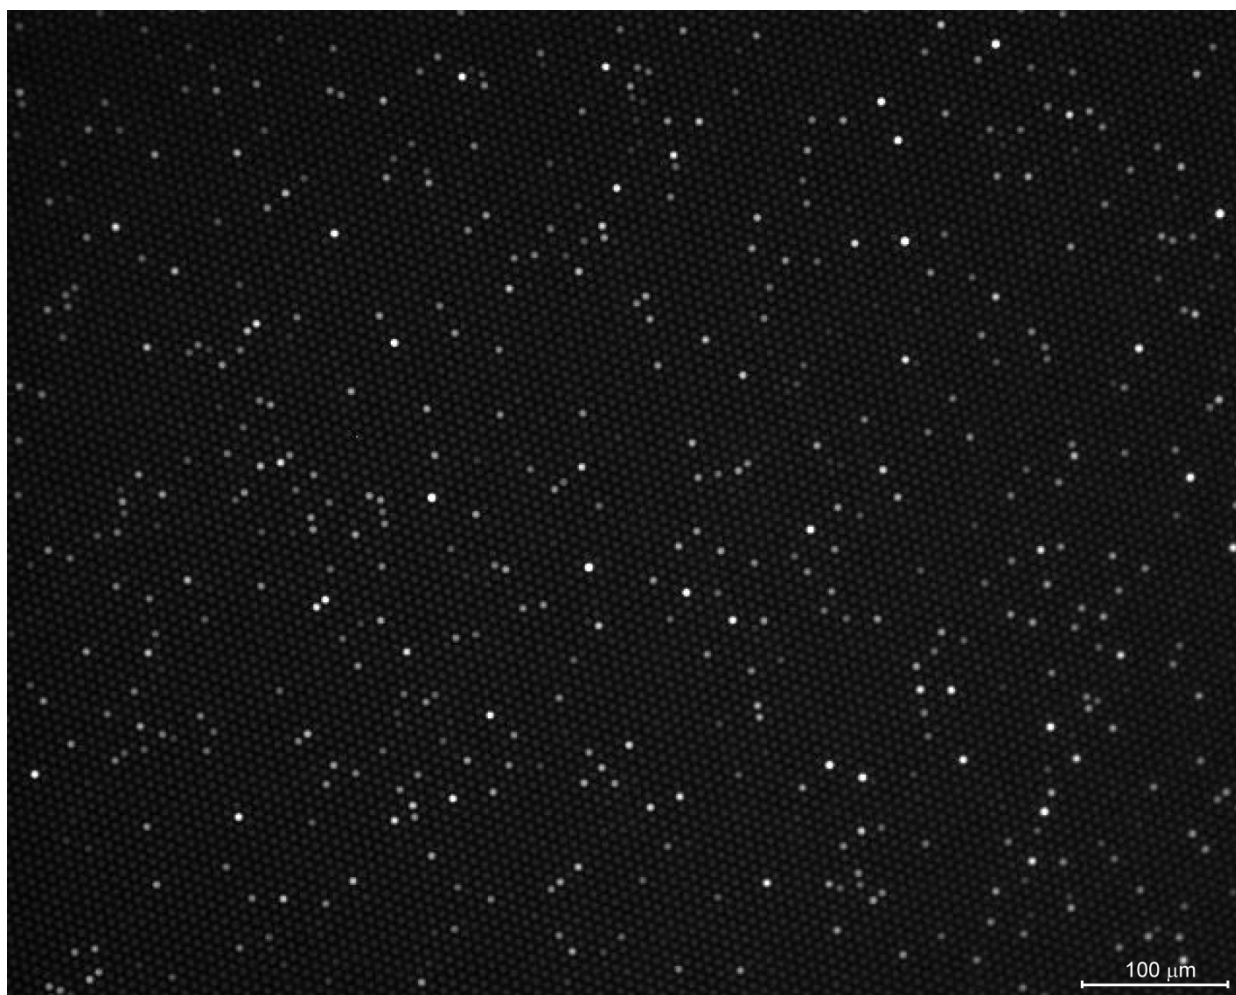

**Fig. S1. On-chip sealing using mineral oil.** A section of the femtoliter microwell array after an enzyme/substrate solution containing 0.72 pM  $\beta$ -gal and 100  $\mu$ M RDG has been sealed by mineral oil with an on-chip protocol. The accumulation of fluorescent product in wells containing an active enzyme molecule makes them clearly distinguishable from the background.

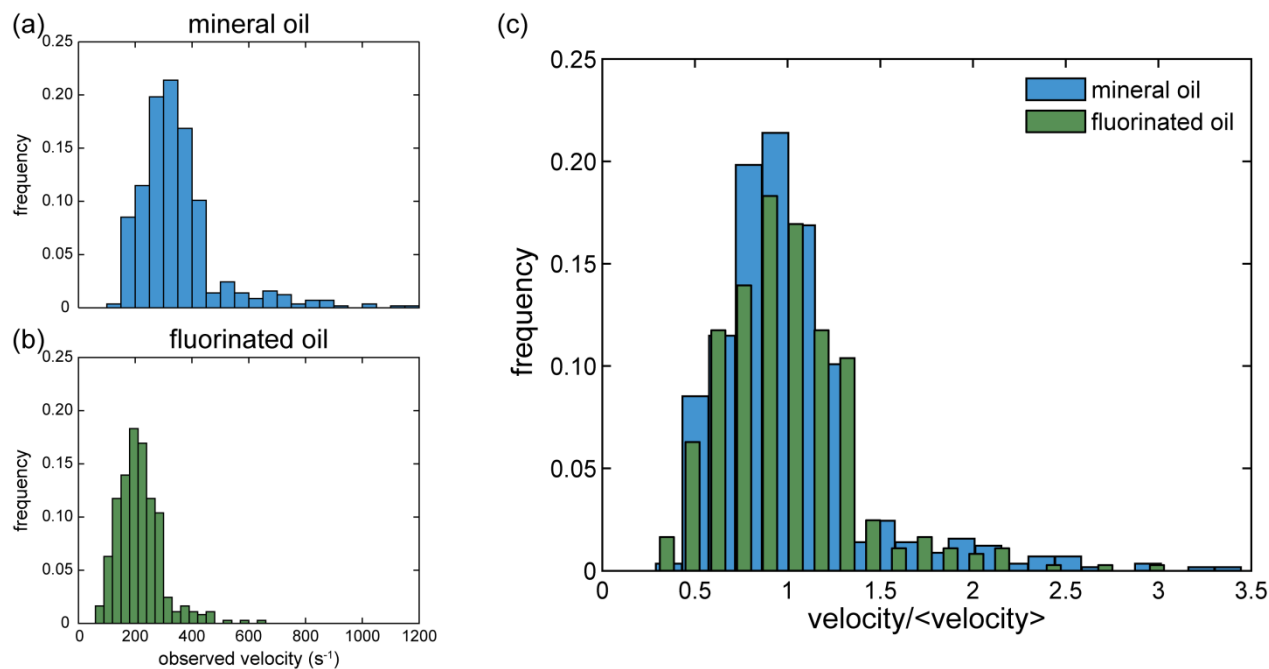

**Fig. S2. Histograms of observed velocities of  $\beta$ -gal enzymes sealed with mineral oil and fluorinated oil.** (a) Histogram of the observed velocities of 575  $\beta$ -gal enzymes sealed with mineral oil using an off-chip protocol. The mean velocity is 350  $\text{sec}^{-1}$ . (b) Histogram of the observed velocities of 366  $\beta$ -gal enzymes sealed with Fluorinert© FC-70 oil using an off-chip protocol. The mean velocity is 220  $\text{sec}^{-1}$ . (c) Normalized histograms of  $\beta$ -gal catalytic turnover rates sealed by FC-70 and mineral oil. The shapes of the distributions correlate well with one another.
